# Supplementary material
Source: PubMed Central journal article supplement (PMC6402319)

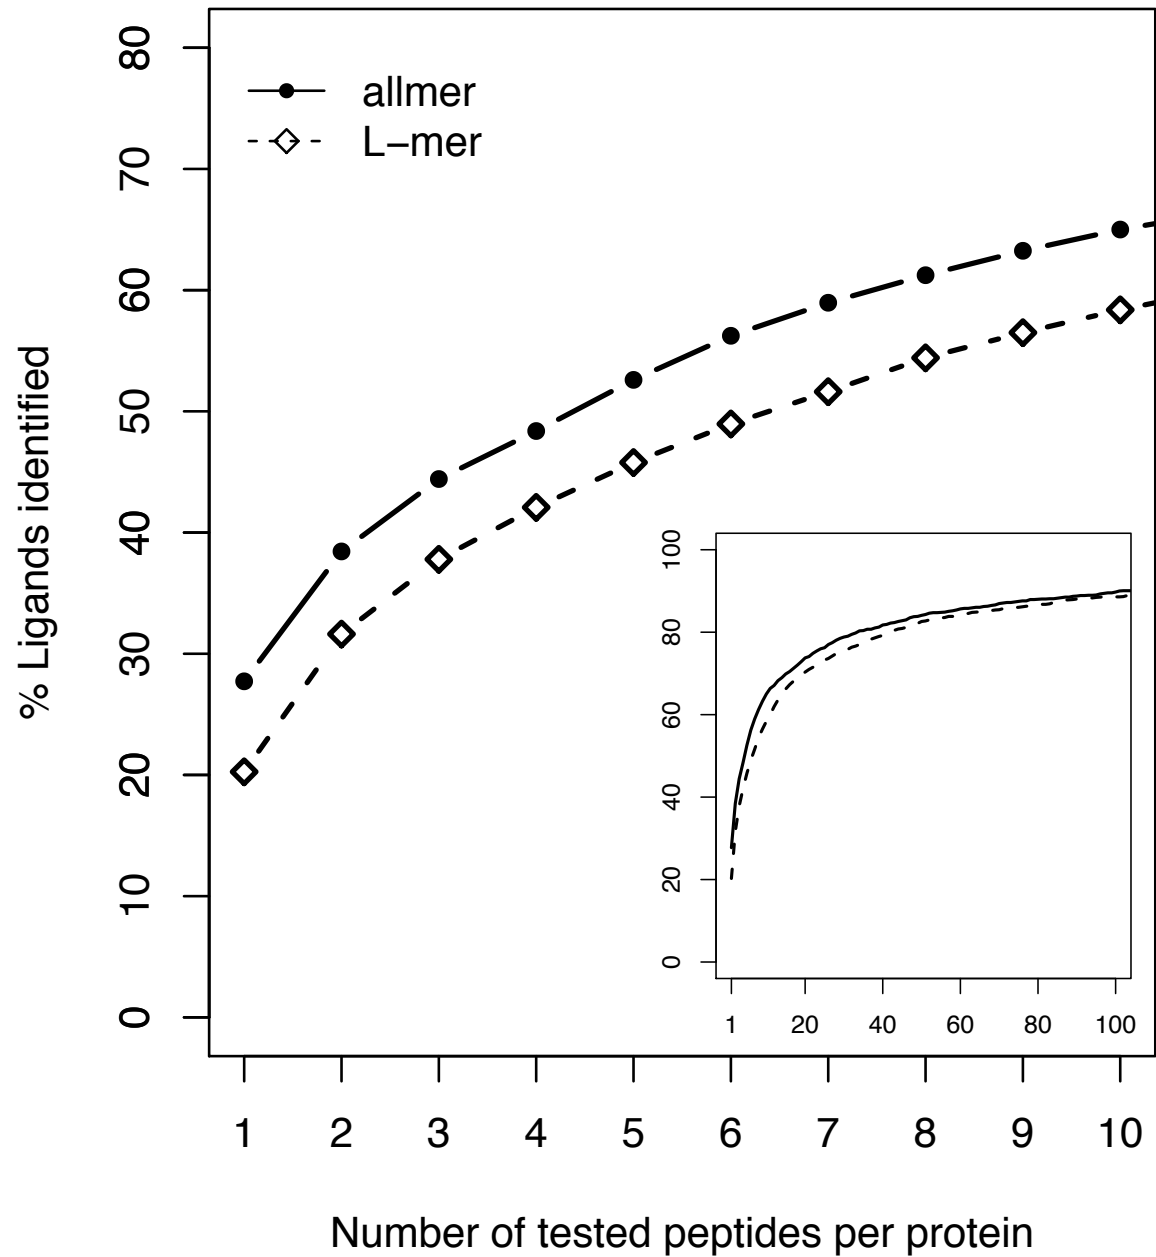

Supplement: supp_btv639_S1_Fig.pdf [file supp_btv639_S1_Fig.pdf]
